# Supplementary material for: Evaluation of Frequency of CMV Replication and Disease Complications Reveals New Cellular Defects and a Time Dependent Pattern in CVID Patients
Source: PubMed Central journal article supplement (PMC11161436; doi:10.1007/s10875-024-01744-3), 2024-06-07
Supplement: 10875_2024_1744_MOESM1_ESM.pdf [file 10875_2024_1744_MOESM1_ESM.pdf]

## **Evaluation of frequency of CMV replication and disease complications reveals new cellular defects and a time dependent pattern in COVID patients**

Luca Marri<sup>1,2</sup>, Paola Contini<sup>1</sup>, Federico Ivaldi<sup>1</sup>, Chiara Schiavi<sup>2</sup>, Ottavia Magnani<sup>2</sup>, Chiara Vassallo<sup>2</sup>, Andrea Guastalla<sup>2</sup>, Noemi Traversone<sup>1,2</sup>, Claudia Angelini<sup>3</sup>, Genny Del Zotto<sup>4</sup>, Andrea De Maria<sup>5,6,a</sup>, Raffaele De Palma<sup>1,2,a</sup>

- a) Department of Internal Medicine (DIMI), University of Genoa, Genova, Italy.
- b) Unit of Clinical Immunology and Translational Medicine, IRCCS Ospedale Policlinico San Martino, Genova, Italy.
- c) Institute for Applied Mathematics "Mauro Picone", National Research Council, Napoli, Italy.
- d) Integrated Department of Services and Laboratories, IRCCS Istituto Giannina Gaslini, Genova, Italy.
- e) Department of Health Sciences (D.I.S.S.A.L.), University of Genoa, Genova, Italy
- f) Infections in Immunocompromised Host Unit, IRCCS Ospedale Policlinico San Martino, Genova, Italy.

1. These authors contributed equally to this paper.

### **Address correspondence to:**

**Prof. Andrea De Maria**, MD, Department of Health Sciences (D.I.S.S.A.L.), University of Genoa, Via A. Pastore, 1, 16132, Genova, Italy. E-mail: [de-maria@unige.it](mailto:de-maria@unige.it)

**Prof. Raffaele De Palma**, MD PhD, Department of Internal Medicine (DIMI), University of Genoa, Viale Benedetto XV, 6 16132, Genova, Italy. E-mail: [raffaele.depalma@unige.it](mailto:raffaele.depalma@unige.it)

## **Supplementary materials**

### **Antibody panel composition**

Anti-CD16 FITC, mouse IgG1, clone NKP15, BD Biosciences.

Anti-CD3 PerCP Cy5.5, mouse IgG1 k, clone SK7, BD Biosciences.

Anti-TCR $\gamma\delta$  PE, mouse IgG1 k, clone B1, Biolegend.

Anti-CD69 PE-Cy7, mouse IgG1 k, clone FN50, BD Biosciences.

Anti-DNAM-1 (CD226) APC, mouse IgG1 k, clone 11A8, Biolegend.

Anti-CD38 AF700, mouse IgG1, clone LS198, Beckman Coulter.

Anti-CD8 APC-Cy7, mouse IgG1 k, clone SK1, Biolegend.

Anti-HLA-DR PB, mouse IgG2a k, clone L243, Biolegend.

Anti-CD45 KO, mouse IgG1, clone J33, Beckman Coulter.

Anti-CD19 BV605, mouse IgG1 k, clone SJ25C1, BD Biosciences.

Anti-CD56 BV650, mouse IgG1 k, clone 5.1H11, Biolegend.

Anti-CD4 BV786, mouse IgG2b k, clone OKT4, Biolegend.

**Supplementary tables**

| <b>Table S1. CVID V.S. non-CVID hID PATIENTS: IMMUNOLOGICAL VARIABLES</b>                           |                       |                      |                          |           |                    |
|-----------------------------------------------------------------------------------------------------|-----------------------|----------------------|--------------------------|-----------|--------------------|
|                                                                                                     | <b>TOTAL<br/>(52)</b> | <b>CVID<br/>(31)</b> | <b>NON-CVID<br/>(21)</b> | <b>MD</b> | <b>P<br/>value</b> |
| <b>IMMUNOGLOBULINS</b>                                                                              |                       |                      |                          |           |                    |
| IgG (onset) (g/L)                                                                                   | 4.3<br>(3.5-5.1)      | 3.1<br>(2.3-4.0)     | 6.0<br>(4.6-7.4)         | -2.88     | <b>0.0003</b>      |
| IgA (g/L)                                                                                           | 0.55<br>(0.36-0.75)   | 0.48<br>(-0.02-0.18) | 1.0<br>(0.6-1.4)         | -0.53     | <b>0.0002</b>      |
| IgM (g/L)                                                                                           | 0.42<br>(0.29-0.56)   | 0.38<br>(0.18-0.59)  | 0.48<br>(0.33-0.64)      | -0.10     | <b>0.0294</b>      |
| IgE (kU/L)                                                                                          | 19.0<br>(8.2-29.9)    | 10.1<br>(2.7-17.5)   | 39.1<br>(7.9-70.4)       | -29       | <b>0.0175</b>      |
| <b>GENERAL IMMUNOPHENOTYPE (ABSOLUTE COUNT: CELLS/<math>\mu</math>L)</b>                            |                       |                      |                          |           |                    |
| Lymphocytes                                                                                         | 2045<br>(1765-2325)   | 2118<br>(1698-2538)  | 1933<br>(1597-2268)      | 185       | 0.782              |
| Lymphocytes<br>(% of WBC)                                                                           | 34.0<br>(31.1-36.9)   | 35.3<br>(31.2-39.5)  | 31.8<br>(28.1-35.6)      | 3.5       | 0.208              |
| Monocytes                                                                                           | 383<br>(333-434)      | 369<br>(306-432)     | 404<br>(315-493)         | -35       | 0.554              |
| Monocytes<br>(% of WBC)                                                                             | 6.5<br>(5.8-7.1)      | 6.3<br>(5.3-7.2)     | 6.8<br>(5.9-7.7)         | -0.5      | 0.169              |
| T-cells                                                                                             | 1357<br>(1167-1547)   | 1446<br>(1177-1716)  | 1225<br>(956-1494)       | 221       | 0.097              |
| T-cells<br>(% of Lymphocytes))                                                                      | 67.0<br>(63.8-70.3)   | 69.3<br>(65.4-73.2)  | 63.5<br>(57.7-69.4)      | 5.7       | 0.141              |
| B cells                                                                                             | 248<br>(170-326)      | 266<br>(155-378)     | 220<br>(108-332)         | 46        | 0.961              |
| B cells<br>(% of Lymphocytes)                                                                       | 11.1<br>(8.6-13.5)    | 10.9<br>(7.9-13.8)   | 11.4<br>(6.8-16.0)       | -0.56     | 0.811              |
| NK-cells                                                                                            | 182<br>(144-221)      | 172<br>(121-222)     | 198<br>(135-261)         | -26       | 0.175              |
| NK-cells<br>(% of Lymphocytes)                                                                      | 9.2<br>(7.5-10.8)     | 8.6<br>(6.5-10.7)    | 10.0<br>(7.0-10.7)       | -1.4      | 0.364              |
| NKT                                                                                                 | 97<br>(46-149)        | 58<br>(31-85)        | 156<br>(32-279)          | -98       | <b>0.027</b>       |
| NKT-cells<br>(% of Lymphocytes)                                                                     | 4.3<br>(2.2-6.5)      | 2.7<br>(1.8-3.6)     | 6.8<br>(1.5-12.1)        | -4.1      | 0.080              |
| Lineage negative (Lin-)                                                                             | 163<br>(137-188)      | 173<br>(134-211)     | 148<br>(118-179)         | 24        | 0.529              |
| Lin- cells<br>(% of lymphocytes)                                                                    | 8.8<br>(7.3-10.2)     | 9.4<br>(7.3-11.5)    | 7.8<br>(5.8-9.8)         | 1.6       | 0.459              |
| <b>B CELLS IMMUNOPHENOTYPE (% OF TOTAL B CELLS)</b>                                                 |                       |                      |                          |           |                    |
| Naïve                                                                                               | 50.4<br>(43.1-57.8)   | 54.4<br>(46.3-62.6)  | 39.2<br>(22.4-56.1)      | 15.2      | 0.0703             |
| IgM <sup>+</sup> IgD <sup>++</sup> CD38 <sup>+</sup> CD27 <sup>-</sup> CD21 <sup>+</sup><br>CD21low | 8.9<br>(5.8-12.1)     | 9.4<br>(5.3-13.5)    | 7.7<br>(3.0-12.4)        | 1.7       | 0.888              |

|                                                                                                 |                            |                            |                        |       |               |
|-------------------------------------------------------------------------------------------------|----------------------------|----------------------------|------------------------|-------|---------------|
| IgM <sup>+</sup> IgD <sup>+</sup> CD38 <sup>low</sup> CD27 <sup>-</sup><br>CD21 <sup>low</sup>  |                            |                            |                        |       |               |
| Class-switched memory                                                                           | 5.3<br>(3.3-7.4)           | 4.1<br>(1.6-6.6)           | 8.4<br>(4.9-11.9)      | -4.3  | <b>0.0130</b> |
| IgM <sup>-</sup> IgD <sup>-</sup> CD38 <sup>+</sup> CD27 <sup>+</sup> CD21 <sup>+</sup>         |                            |                            |                        |       |               |
| Non-switched memory                                                                             | 12.7<br>(7.5-17.8)         | 8.3<br>(4.1-12.5)          | 25.1<br>(9.9-40.2)     | -16.8 | <b>0.0087</b> |
| IgM <sup>++</sup> IgD <sup>+</sup> CD38 <sup>+</sup> CD27 <sup>+</sup> CD21 <sup>+</sup>        |                            |                            |                        |       |               |
| Transitional                                                                                    | 6.6<br>(3.2-9.9)           | 7.6<br>(3.2-12.0)          | 3.7<br>(-0.1-7.5)      | 3.9   | 0.104         |
| IgM <sup>++</sup> IgD <sup>++</sup> CD38 <sup>++</sup> CD27 <sup>-</sup><br>CD21 <sup>+</sup>   |                            |                            |                        |       |               |
| Plasmablasts                                                                                    | 0.34<br>(0.09-0.60)        | 0.37<br>(0.05-0.69)        | 0.27<br>(-0.18-0.73)   | 0.10  | 0.962         |
| IgM <sup>-/+</sup> IgD <sup>-</sup><br>CD38 <sup>+++</sup> CD27 <sup>++</sup> CD21 <sup>+</sup> |                            |                            |                        |       |               |
| <b>T-CELLS IMMUNOPHENOTYPE</b>                                                                  |                            |                            |                        |       |               |
| $\alpha\beta$ T-cells                                                                           | 1327<br>(1140-1515)        | 1409<br>(1145-1673)        | 1206<br>(935-1477)     | 203   | 0.113         |
| <b><math>\alpha\beta</math> T-cells<br/>(% of T-cells)</b>                                      | 97.7<br>(97.1-98.2)        | 97.4<br>(96.8-98.1)        | 98.0<br>(97.0-99.1)    | -0.6  | <b>0.020</b>  |
| $\gamma\delta$ T-cells                                                                          | 29.8<br>(21.7-37.9)        | 37.1<br>(24.8-49.4)        | 19.0<br>(11.4-26.5)    | 18.1  | <b>0.004</b>  |
| <b><math>\gamma\delta</math> T-cells<br/>(% of T-cells)</b>                                     | 2.3<br>(1.8-2.8)           | 2.6<br>(1.9-3.2)           | 1.9<br>(0.9-3.0)       | 0.6   | <b>0.019</b>  |
| $\alpha\beta$ CD4+ T                                                                            | 808<br>(697-918)           | 805<br>(667-942)           | 812<br>(614-1010)      | -8    | 0.671         |
| $\alpha\beta$ CD4+ T<br>(% of $\alpha\beta$ T-cells)                                            | 61.9<br>(58.8-65.1)        | 58.7<br>(54.4-63.2)        | 66.6<br>(62.8-70.3)    | -7.8  | <b>0.012</b>  |
| $\alpha\beta$ CD8+ T                                                                            | 455<br>(360-550)           | 528<br>(384-672)           | 341<br>(258-425)       | 187   | <b>0.045</b>  |
| $\alpha\beta$ CD8+ T<br>(% of $\alpha\beta$ T-cells)                                            | 33.0<br>(30.1-35.9)        | 35.7<br>(31.6-39.7)        | 28.8<br>(25.2-32.4)    | 6.9   | <b>0.016</b>  |
| $\alpha\beta$ DN T-cells                                                                        | 59.3<br>(46.1-72.6)        | 68.0<br>(48.5-87.4)        | 46.0<br>(30.6-61.4)    | 22.0  | 0.095         |
| <b><math>\alpha\beta</math> DN T-cells<br/>(% of <math>\alpha\beta</math> T-cells)</b>          | 4.6<br>(3.8-5.4)           | 5.0<br>(3.9-6.1)           | 4.0<br>(2.7-5.3)       | 1.0   | 0.163         |
| $\alpha\beta$ CD4+CD8+ T                                                                        | 9.3<br>(4.9-13.6)          | 8.5<br>(2.6-14.3)          | 10.5<br>(3.5-17.6)     | -2.0  | 0.931         |
| $\alpha\beta$ CD4+CD8+ T<br>(% of $\alpha\beta$ T-cells)                                        | 0.67<br>(0.40-0.94)        | 0.52<br>(0.24-0.80)        | 0.9<br>(0.3-1.5)       | -0.38 | 0.871         |
| <b>NK IMMUNOPHENOTYPE (% OF TOTAL NK-CELLS)</b>                                                 |                            |                            |                        |       |               |
| NK CD56 <sup>dim</sup>                                                                          | 168.0<br>(131.0-<br>205.0) | 157.3<br>(108.4-<br>206.2) | 168.4<br>(112.4-224.5) | -26.4 | 0.169         |
| NK CD56 <sup>dim</sup> %                                                                        | 90.8<br>(87.9-93.6)        | 90.6<br>(86.4-94.8)        | 91.0<br>(87.0-95.1)    | -0.45 | 0.345         |
| NK CD56 <sup>bright</sup>                                                                       | 11.4<br>(9.1-13.7)         | 10.3<br>(7.8-12.8)         | 13.1<br>(8.5-17.6)     | -2.8  | 0.335         |
| NK CD56 <sup>bright</sup> %                                                                     | 7.7<br>(6.3-9.0)           | 7.31<br>(6.11-8.51)        | 8.2<br>(5.2-11.2)      | -0.86 | 0.505         |

---

Quantitative variables are expressed as means with a 95% confidence interval, while qualitative variables are represented as absolute frequencies with percentages relative to the total of the respective column. P values were calculated by either unpaired two-tailed Student's t-test or Mann-Whitney u test according to variable distribution and sample size. OR: odds ratio; MD: mean difference; DN: double negative

---

**Table S2. Comparison between CVID patients with active CMV replication vs non-replicating**

|                                                                          | Total<br>(31)        | CMV<br>(5)           | Non/CMV<br>(26)      | OR/<br>MD | P value<br>(univar.) |
|--------------------------------------------------------------------------|----------------------|----------------------|----------------------|-----------|----------------------|
| <b>SAMPLE DEMOGRAPHICS</b>                                               |                      |                      |                      |           |                      |
| Male                                                                     | 14(45%)              | 1(20%)               | 13(50%)              | 0.25      | 0.3445               |
| Female                                                                   | 17(55%)              | 4(80%)               | 13(50%)              | 4.0       | 0.3445               |
| Age                                                                      | 50.4<br>(44.1-56.7)  | 56<br>(37.0-75.0)    | 49.4<br>(42.3-56.4)  | 6.7       | 0.4352               |
| <b>CLINICAL VARIABLES</b>                                                |                      |                      |                      |           |                      |
| Age at diagnosis                                                         | 39.0<br>(32.3-45.8)  | 41.8<br>(18.8-64.8)  | 38.5<br>(30.9-46.1)  | 3.3       | 0.6861               |
| Disease duration                                                         | 13.7<br>(8.8-18.5)   | 16.2<br>(3.6-28.8)   | 13.2<br>(7.6-18.7)   | 3.0       | 0.4078               |
| Ig replacement therapy (IGRT)                                            | 23(74%)              | 4(80%)               | 19(73%)              | 1.474     | >0.9999              |
| IGRT duration                                                            | 8.1<br>(4.8-11.4)    | 12.0<br>(1.7-22.3)   | 7.2<br>(3.6-10.8)    | 4.8       | 0.3112               |
| Infections                                                               | 29(94%)              | 5(100%)              | 24(92%)              | Infinity  | >0.9999              |
| Autoimmunity                                                             | 19(61%)              | 3(60%)               | 16(62%)              | 0.9375    | >0.9999              |
| Splenomegaly                                                             | 12(39%)              | 5(100%)              | 7(27%)               | Infinity  | <b>0.0047</b>        |
| Granulomatosis                                                           | 6(19%)               | 2(40%)               | 4(15%)               | 3.667     | 0.2020               |
| Malignancies                                                             | 6(19%)               | 1(20%)               | 5(19%)               | 1.05      | 0.9682               |
| Lymphadenomegaly                                                         | 12(39%)              | 4(80%)               | 8(31%)               | 9.0       | 0.0600               |
| Lung involvement                                                         | 13(42%)              | 4(80%)               | 9(35%)               | 7.556     | 0.1337               |
| Atopy                                                                    | 10(32%)              | 0(0%)                | 10(38%)              | 0         | 0.1472               |
| Blood EBV replication                                                    | 6(19%)               | 3(60%)               | 3(12%)               | 11.5      | <b>0.0376</b>        |
| <b>IMMUNOGLOBULINS</b>                                                   |                      |                      |                      |           |                      |
| IgG (onset) (g/L)                                                        | 3.1<br>(2.3-4.0)     | 1.6<br>(-1.1-4.4)    | 3.3<br>(2.4-4.2)     | -1.7      | 0.2740               |
| IgA (g/L)                                                                | 0.48<br>(-0.02-0.18) | 0.11<br>(-0.16-0.38) | 0.56<br>(-0.04-1.15) | -0.45     | 0.2498               |
| IgM (g/L)                                                                | 0.38<br>(0.18-0.59)  | 0.35<br>(-0.25-0.95) | 0.39<br>(0.15-0.62)  | -0.04     | 0.8870               |
| IgE (kU/L)                                                               | 10.1<br>(2.7-17.5)   | 2.2<br>(-4.0-8.5)    | 11.9<br>(2.9-20.9)   | -9.7      | 0.3323               |
| <b>GENERAL IMMUNOPHENOTYPE (ABSOLUTE COUNT: CELLS/<math>\mu</math>L)</b> |                      |                      |                      |           |                      |
| Lymphocytes                                                              | 2118<br>(1698-2538)  | 2220<br>(157-4283)   | 2098<br>(1669-2528)  | 121       | 0.584                |
| Lymphocytes<br>(% of WBC)                                                | 35.3<br>(31.2-39.5)  | 38.1<br>(17.9-58.2)  | 34.9<br>(30.6-39.1)  | 3.2       | 0.480                |
| Monocytes                                                                | 369<br>(306-432)     | 376<br>(55-698)      | 368<br>(305-431)     | 9         | 0.696                |
| Monocytes<br>(% of WBC)                                                  | 6.3<br>(5.3-7.2)     | 6.0<br>(4.4-7.5)     | 6.3<br>(5.1-7.5)     | -0.4      | 1.000                |
| T cells                                                                  | 1446<br>(1177-1716)  | 1675<br>(226-3124)   | 1402<br>(1141-1664)  | 273       | 0.897                |
| T cells<br>(% of Lymphocytes)                                            | 69.3<br>(65.4-73.2)  | 77.3<br>(70.6-84.1)  | 67.7<br>(63.4-72.1)  | 9.6       | <b>0.041</b>         |
| B cells                                                                  | 266<br>(155-378)     | 252<br>(-177-681)    | 261<br>(142-380)     | -9        | 0.514                |
| B cells<br>(% of Lymphocytes)                                            | 10.9<br>(7.9-13.8)   | 8.3<br>(1.6-14.9)    | 11.4<br>(8.0-14.7)   | -3.1      | 0.548                |
| NK cells                                                                 | 172<br>(121-222)     | 97<br>(23-170)       | 186<br>(127-245)     | -90       | 0.235                |
| NK cells<br>(% of Lymphocytes)                                           | 8.6<br>(6.5-10.7)    | 5.2<br>(1.3-9.1)     | 9.3<br>(6.9-11.6)    | -4.0      | 0.159                |
| NKT-LIKE                                                                 | 58<br>(31-85)        | 87<br>(-74-249)      | 52<br>(28-76)        | 35        | 0.735                |
| NKT-LIKE cells<br>(% of Lymphocytes)                                     | 2.7<br>(1.8-3.6)     | 2.7<br>(-0.6-6.1)    | 2.7<br>(1.7-3.7)     | 0.06      | 0.856                |
| Lineage negative (Lin-)                                                  | 173<br>(134-211)     | 129<br>(36-221)      | 181<br>(137-225)     | -52       | 0.358                |
| Lin- cells<br>(% of lymphocytes)                                         | 9.4<br>(7.3-11.5)    | 7.8<br>(1.8-13.8)    | 9.7<br>(7.4-12.1)    | -1.9      | 0.658                |

| <b>B CELLS IMMUNOPHENOTYPE (% OF TOTAL B CELLS)</b>                                          |             |              |             |       |        |
|----------------------------------------------------------------------------------------------|-------------|--------------|-------------|-------|--------|
| Naïve                                                                                        | 54.4        | 58.5         | 53.7        | 4.8   | 0.8987 |
| IgM <sup>+</sup> IgD <sup>++</sup> CD38 <sup>+</sup> CD27 <sup>-</sup> CD21 <sup>+</sup>     | (46.3-62.6) | (39.3-77.7)  | (44.1-63.2) |       |        |
| CD21 <sup>low</sup>                                                                          | 9.4         | 15.4         | 8.2         | 7.2   | 0.1724 |
| IgM <sup>+</sup> IgD <sup>+</sup> CD38 <sup>low</sup> CD27 <sup>-</sup> CD21 <sup>low</sup>  | (5.3-13.5)  | (-5.0-35.7)  | (4.2-12.3)  |       |        |
| Class-switched memory                                                                        | 4.1         | 2.3          | 4.5         | -2.2  | 0.9688 |
| IgM <sup>-</sup> IgD <sup>-</sup> CD38 <sup>+</sup> CD27 <sup>+</sup> CD21 <sup>+</sup>      | (1.6-6.6)   | (-0.1-4.8)   | (1.5-7.4)   |       |        |
| Non-switched memory                                                                          | 8.3         | 3.6          | 9.1         | -5.5  | 0.8450 |
| IgM <sup>++</sup> IgD <sup>+</sup> CD38 <sup>+</sup> CD27 <sup>+</sup> CD21 <sup>+</sup>     | (4.1-12.5)  | (1.7-5.4)    | (4.2-14.1)  |       |        |
| Transitional                                                                                 | 7.6         | 8.2          | 7.5         | 0.7   | 0.2448 |
| IgM <sup>++</sup> IgD <sup>++</sup> CD38 <sup>++</sup> CD27 <sup>+</sup> CD21 <sup>+</sup>   | (3.2-12.0)  | (0.04-16.4)  | (2.2-12.7)  |       |        |
| Plasmablasts                                                                                 | 0.37        | 0.78         | 0.29        | 0.49  | 0.5366 |
| IgM <sup>-/+</sup> IgD <sup>-</sup> CD38 <sup>+++</sup> CD27 <sup>++</sup> CD21 <sup>+</sup> | (0.05-0.69) | (-1.18-2.74) | (0.01-0.56) |       |        |
| <b>T CELLS IMMUNOPHENOTYPE</b>                                                               |             |              |             |       |        |
| αβ T cells                                                                                   | 1409        | 1644         | 1364        | 280   | 0.938  |
|                                                                                              | (1145-1673) | (197-3092)   | (1112-1616) |       |        |
| αβ T cells                                                                                   | 97.4        | 97.9         | 97.4        | 0.6   | 0.176  |
| (% of T cells)                                                                               | (96.8-98.1) | (95.4-100.4) | (96.7-98.0) |       |        |
| γδ T cells                                                                                   | 37.1        | 30.5         | 38.4        | -7.9  | 0.480  |
|                                                                                              | (24.8-49.4) | (-8.2-69.2)  | (24.5-52.3) |       |        |
| γδ T cells                                                                                   | 2.6         | 2.1          | 2.6         | -0.6  | 0.176  |
| (% of T cells)                                                                               | (1.9-3.2)   | (-0.5-4.6)   | (2.0-3.3)   |       |        |
| αβ CD4 <sup>+</sup> T                                                                        | 805         | 770          | 811         | -42   | 0.775  |
|                                                                                              | (667-942)   | (306-1233)   | (657-966)   |       |        |
| αβ CD4 <sup>+</sup> T                                                                        | 58.7        | 50.8         | 60.3        | -9.5  | 0.195  |
| (% of αβ T cells)                                                                            | (54.4-63.2) | (34.4-67.2)  | (55.7-65.0) |       |        |
| αβ CD8 <sup>+</sup> T                                                                        | 528         | 787          | 478         | 309   | 0.417  |
|                                                                                              | (384-672)   | (-139-1713)  | (364-593)   |       |        |
| αβ CD8 <sup>+</sup> T                                                                        | 35.7        | 44.0         | 34.1        | 9.9   | 0.081  |
| (% of αβ T cells)                                                                            | (31.6-39.7) | (31.0-56.9)  | (29.8-38.3) |       |        |
| αβ DN T cells                                                                                | 68.0        | 68.3         | 67.9        | 0.5   | 0.775  |
|                                                                                              | (48.5-87.4) | (-6.8-143.4) | (46.6-89.2) |       |        |
| αβ DN T cells                                                                                | 5.0         | 4.5          | 5.1         | -0.6  | 0.257  |
| (% of αβ T cells)                                                                            | (3.9-6.1)   | (-0.5-9.6)   | (4.0-6.2)   |       |        |
| αβ CD4 <sup>+</sup> CD8 <sup>+</sup> T                                                       | 8.5         | 19.5         | 6.4         | 13.1  | 0.979  |
|                                                                                              | (2.6-14.3)  | (-25.0-64.1) | (3.0-9.8)   |       |        |
| αβ CD4 <sup>+</sup> CD8 <sup>+</sup> T                                                       | 0.52        | 0.70         | 0.49        | 0.21  | 0.735  |
| (% of αβ T cells)                                                                            | (0.24-0.80) | (-0.40-1.80) | (0.18-0.79) |       |        |
| αβ CD4 <sup>+</sup> DR <sup>+</sup> T                                                        | 36.1        | 35.3         | 36.2        | -0.9  | 0.815  |
|                                                                                              | (27.6-44.5) | (4.1-66.5)   | (26.9-45.6) |       |        |
| αβ CD4 <sup>+</sup> DR <sup>+</sup> T                                                        | 5.1         | 5.6          | 5.0         | 0.6   | 0.815  |
| (% of CD4 αβ T cells)                                                                        | (3.9-6.2)   | (0.7-10.5)   | (3.8-6.2)   |       |        |
| αβ CD4 <sup>+</sup> CD69 <sup>+</sup> T                                                      | 11.6        | 11.2         | 11.7        | -0.5  | 0.938  |
|                                                                                              | (8.2-15.1)  | (1.4-21.0)   | (7.7-15.7)  |       |        |
| αβ CD4 <sup>+</sup> CD69 <sup>+</sup> T                                                      | 1.6         | 1.5          | 1.6         | -0.02 | 0.696  |
| (% of CD4 αβ T cells)                                                                        | (1.0-2.1)   | (0.3-2.8)    | (0.9-2.2)   |       |        |
| αβ CD4 <sup>+</sup> DR <sup>+</sup> CD69 <sup>+</sup> T                                      | 1.1         | 1.6          | 1.0         | 0.6   | 0.938  |
|                                                                                              | (0.6-1.6)   | (-1.3-4.6)   | (0.6-1.4)   |       |        |
| αβ CD4 <sup>+</sup> DR <sup>+</sup> CD69 <sup>+</sup> T                                      | 0.2         | 0.2          | 0.1         | 0.1   | 0.658  |
| % of CD4 αβ T cells                                                                          | (0.1-0.2)   | (-0.2-0.6)   | (0.07-0.2)  |       |        |
| αβ CD4 <sup>+</sup> DR <sup>+</sup> CD38 <sup>+</sup> T                                      | 13.8        | 23.7         | 11.9        | 11.8  | 0.063  |
|                                                                                              | (8.9-18.8)  | (2.5-45.0)   | (7.0-16.9)  |       |        |
| αβ CD4 <sup>+</sup> DR <sup>+</sup> CD38 <sup>+</sup> T                                      | 2.1         | 3.7          | 1.7         | 2.0   | 0.103  |
| (% of CD4 αβ T cells)                                                                        | (1.4-2.8)   | (0.6-6.8)    | (1.1-2.4)   |       |        |
| αβ CD4 <sup>+</sup> CD38 <sup>+</sup> CD69 <sup>+</sup> T                                    | 4.6         | 4.0          | 4.7         | -0.7  | 0.620  |
|                                                                                              | (3.0-6.3)   | (1.8-6.2)    | (2.8-6.7)   |       |        |
| αβ CD4 <sup>+</sup> CD38 <sup>+</sup> CD69 <sup>+</sup> T                                    | 0.6         | 0.6          | 0.6         | -0.01 | 0.897  |
| (% of CD4 αβ T cells)                                                                        | (0.4-0.8)   | (0.2-1.0)    | (0.4-0.8)   |       |        |
| αβ CD8 <sup>+</sup> DR <sup>+</sup> T                                                        | 32.2        | 40.1         | 30.7        | 9.5   | 0.214  |
|                                                                                              | (22.1-42.3) | (15.8-64.4)  | (19.0-42.3) |       |        |
| αβ CD8 <sup>+</sup> DR <sup>+</sup> T                                                        | 6.9         | 7.8          | 6.7         | 1.1   | 0.735  |
| (% of CD8 αβ T cells)                                                                        | (5.3-8.4)   | (0.9-14.7)   | (5.1-8.3)   |       |        |
| αβ CD8 <sup>+</sup> CD69 <sup>+</sup> T                                                      | 22.1        | 28.6         | 20.9        | 7.7   | 0.235  |
|                                                                                              | (6.7-37.6)  | (-8.7-65.9)  | (2.9-38.8)  |       |        |
| αβ CD8 <sup>+</sup> CD69 <sup>+</sup> T                                                      | 4.3         | 3.4          | 4.4         | -1.0  | 0.115  |
| (% of CD8 αβ T cells)                                                                        | (1.3-7.3)   | (2.9-3.9)    | (0.8-8.1)   |       |        |
| αβ CD8 <sup>+</sup> DR <sup>+</sup> CD69 <sup>+</sup> T                                      | 1.6         | 2.6          | 1.4         | 1.2   | 0.214  |

|                                            |                    |                    |                    |     |       |
|--------------------------------------------|--------------------|--------------------|--------------------|-----|-------|
|                                            | (1.1-2.1)          | (-0.3-5.5)         | (1.0-1.9)          |     |       |
| αβ CD8+DR+CD69+ T<br>(% of CD8 αβ T cells) | 0.4<br>(0.3-0.5)   | 0.5<br>(0.03-0.9)  | 0.3<br>(0.2-0.5)   | 0.1 | 0.448 |
| αβ CD8+DR+CD38+ T                          | 13.5<br>(8.2-18.8) | 21.3<br>(4.8-37.9) | 12.0<br>(6.1-17.9) | 9.3 | 0.055 |
| αβ CD8+DR+CD38+ T<br>(% of CD8 αβ T cells) | 2.7<br>(1.9-3.4)   | 4.0<br>(0.3-7.7)   | 2.4<br>(1.7-3.1)   | 1.6 | 0.214 |
| αβ CD8+CD38+CD69+ T                        | 3.8<br>(1.5-6.1)   | 9.4<br>(-7.0-25.8) | 2.7<br>(1.4-4.0)   | 6.7 | 0.103 |
| αβ CD8+CD38+CD69+<br>(% of CD8 αβ T cells) | 0.7<br>(0.4-0.9)   | 0.9<br>(0.3-1.5)   | 0.6<br>(0.3-0.9)   | 0.3 | 0.115 |

---

#### NK IMMUNOPHENOTYPE (% OF TOTAL NK CELLS)

|                             |                        |                      |                        |        |              |
|-----------------------------|------------------------|----------------------|------------------------|--------|--------------|
| NK CD56 <sup>dim</sup>      | 157.3<br>(108.4-206.2) | 66.3<br>(34.7-97.9)  | 174.8<br>(118.8-230.9) | -108.6 | 0.071        |
| NK CD56 <sup>dim</sup> %    | 90.6<br>(86.4-94.8)    | 80.3<br>(46.3-114.3) | 92.6<br>(91.2-93.9)    | -12.2  | 0.280        |
| NK CD56 <sup>bright</sup>   | 10.3<br>(7.8-12.8)     | 5.6<br>(3.4-7.8)     | 11.2<br>(8.3-14.1)     | -5.5   | 0.103        |
| NK CD56 <sup>bright</sup> % | 7.31<br>(6.11-8.51)    | 6.84<br>(4.16-9.51)  | 7.39<br>(6.03-8.76)    | -0.59  | 0.979        |
| NK DR+                      | 16.7<br>(11.8-21.5)    | 7.0<br>(4.3-9.7)     | 18.5<br>(13.0-24.1)    | -11.6  | <b>0.048</b> |
| NK DR+ %                    | 13.2<br>(8.8-17.6)     | 9.3<br>(3.6-15.1)    | 13.9<br>(8.7-19.2)     | -4.6   | 0.735        |
| NK CD69+                    | 9.5<br>(4.8-14.1)      | 3.3<br>(1.2-5.4)     | 10.7<br>(5.2-16.2)     | -7.3   | 0.387        |
| NK CD69+ %                  | 6.7<br>(3.4-10.0)      | 4.2<br>(0.6-7.9)     | 7.2<br>(3.3-11.1)      | -3.0   | 0.735        |
| NK DR+CD69+                 | 2.7<br>(-0.2-5.5)      | 0.5<br>(-0.03-1.0)   | 3.1<br>(-0.3-6.5)      | -2.6   | 0.448        |
| NK DR+CD69+ %               | 2.8<br>(-0.3-5.8)      | 0.5<br>(0.2-0.9)     | 3.2<br>(-0.4-6.9)      | -2.7   | 0.696        |

---

#### PUTATIVE LYMPHOID PRECURSORS

|                                    |                      |                       |                       |       |       |
|------------------------------------|----------------------|-----------------------|-----------------------|-------|-------|
| PUTATIVE CD56-CD16+<br>PRECURSORS  | 11.3<br>(7.5-15.1)   | 5.94<br>(-3.16-15.05) | 12.34<br>(8.04-16.64) | -6.40 | 0.129 |
| PUTATIVE CD56-CD16+<br>PRECURSORS% | 3.45<br>(2.23-4.67)  | 3.61<br>(-2.98-10.20) | 3.42<br>(2.23-4.61)   | 0.19  | 0.514 |
| LIN-DNAM <sup>bright</sup>         | 9.99<br>(6.56-13.41) | 3.74<br>(-0.46-7.93)  | 11.19<br>(7.28-15.09) | -7.45 | 0.195 |
| LIN-DNAM <sup>bright</sup> %       | 3.06<br>(1.85-4.27)  | 1.60<br>(0.41-2.78)   | 3.34<br>(1.92-4.77)   | -1.75 | 0.514 |

Quantitative variables were expressed as means with a 95% confidence interval, while qualitative variables were represented as absolute frequencies with percentages relative to the total of the respective column. P values were calculated by either unpaired two-tailed Student's t-test or Mann-Whitney u test according to variable distribution and sample size. OR: odds ratio; MD: mean difference; DN: double negative; Univar.: univariate analysis.



**Table S3. Comparison between CVID patients with active EBV replication vs non-replicating**

|                                                                           | Total<br>(31)        | EBV<br>(6)           | Non-EBV<br>(25)      | OR/<br>MD | P value<br>(univar.) |
|---------------------------------------------------------------------------|----------------------|----------------------|----------------------|-----------|----------------------|
| <b>SAMPLE DEMOGRAPHICS</b>                                                |                      |                      |                      |           |                      |
| Male                                                                      | 14(45%)              | 3(50%)               | 11(44%)              | 1.273     | >0.9999              |
| Female                                                                    | 17(55%)              | 3(50%)               | 14(56%)              | 0.7857    | >0.9999              |
| Age                                                                       | 50.4<br>(44.1-56.7)  | 49.8<br>(30.0-69.7)  | 50.6<br>(43.5-57.6)  | -0.7      | 0.9274               |
| <b>CLINICAL VARIABLES</b>                                                 |                      |                      |                      |           |                      |
| Age at diagnosis                                                          | 39.0<br>(32.3-45.8)  | 37.5<br>(16.2-58.8)  | 39.4<br>(31.8-47.0)  | -1.9      | 0.9901               |
| Disease duration                                                          | 13.7<br>(8.8-18.5)   | 13.7<br>(2.5-24.9)   | 13.6<br>(7.9-19.3)   | 0.03      | 0.7231               |
| Ig replacement therapy (IGRT)                                             | 23(74%)              | 4(67%)               | 19(76%)              | 0.6316    | 0.6344               |
| IGRT duration                                                             | 8.1<br>(4.8-11.4)    | 8.0<br>(-3.4-19.4)   | 8.1<br>(4.5-11.8)    | -0.1      | 0.9863               |
| Infections                                                                | 29(94%)              | 6(100%)              | 23(92%)              | Infinity  | >0.9999              |
| Autoimmunity                                                              | 19(61%)              | 3(50%)               | 16(64%)              | 0.5625    | 0.6526               |
| Splenomegaly                                                              | 12(39%)              | 4(67%)               | 8(32%)               | 4.25      | 0.1735               |
| Granulomatosis                                                            | 6(19%)               | 0(0%)                | 6(24%)               | 0         | 0.1815               |
| Malignancies                                                              | 6(19%)               | 2(33%)               | 4(16%)               | 2.625     | 0.3345               |
| Lymphadenomegaly                                                          | 12(39%)              | 3(50%)               | 9(36%)               | 1.778     | 0.6526               |
| Lung involvement                                                          | 13(42%)              | 3(50%)               | 10(40%)              | 1.500     | 0.6758               |
| Atopy                                                                     | 10(32%)              | 0(0%)                | 10(40%)              | 0         | 0.1411               |
| Blood EBV replication                                                     | 6(19%)               | 3(50%)               | 2(8%)                | 11.5      | <b>0.0376</b>        |
| <b>IMMUNOGLOBULINS</b>                                                    |                      |                      |                      |           |                      |
| IgG (onset) (g/L)                                                         | 3.1<br>(2.3-4.0)     | 3.6<br>(1.7-5.5)     | 3.1<br>(2.1-4.0)     | 0.5       | 0.6446               |
| IgA (g/L)                                                                 | 0.48<br>(-0.02-0.18) | 0.35<br>(0.01-0.69)  | 0.52<br>(-0.11-1.14) | -0.17     | 0.2023               |
| IgM (g/L)                                                                 | 0.38<br>(0.18-0.59)  | 0.36<br>(-0.07-0.80) | 0.39<br>(0.14-0.63)  | -0.03     | 0.8171               |
| IgE (kU/L)                                                                | 10.1<br>(2.7-17.5)   | 8.7<br>(-8.6-26.0)   | 10.5<br>(1.6-19.5)   | -1.8      | 0.7787               |
| <b>GENERAL IMMUNOPHENOTYPE (ABSOLUTE COUNT: CELLS/ <math>\mu</math>L)</b> |                      |                      |                      |           |                      |
| Lymphocytes                                                               | 2118<br>(1698-2538)  | 2262<br>(683-3841)   | 2084<br>(1638-2529)  | 178       | 0.865                |
| Lymphocytes<br>(% of WBC)                                                 | 35.3<br>(31.2-39.5)  | 35.6<br>(20.1-51.0)  | 35.3<br>(30.9-39.8)  | 0.2       | 0.789                |
| Monocytes                                                                 | 369<br>(306-432)     | 426<br>(205-646)     | 356<br>(288-423)     | 70        | 0.575                |
| Monocytes<br>(% of WBC)                                                   | 6.3<br>(5.3-7.2)     | 6.5<br>(5.4-7.7)     | 6.2<br>(5.0-7.4)     | 0.3       | 0.227                |
| T cells                                                                   | 1446<br>(1177-1716)  | 1663<br>(510-2815)   | 1395<br>(1130-1659)  | 268       | 0.715                |
| T Lymphocytes<br>(% of Lymphocytes)                                       | 69.3<br>(65.4-73.2)  | 73.3<br>(65.9-80.8)  | 68.3<br>(63.6-73.0)  | 5.0       | 0.339                |
| B cells                                                                   | 266<br>(155-378)     | 243<br>(-81-566)     | 263<br>(139-387)     | -21       | 0.827                |
| B cells<br>(% of Lymphocytes)                                             | 10.9<br>(7.9-13.8)   | 9.0<br>(3.3-14.6)    | 11.3<br>(7.8-14.8)   | -2.4      | 0.643                |
| NK cells                                                                  | 172<br>(121-222)     | 145<br>(55-235)      | 178<br>(117-240)     | -34       | 0.942                |
| NK cells<br>(% of Lymphocytes)                                            | 8.6<br>(6.5-10.7)    | 7.8<br>(2.6-13.0)    | 8.8<br>(6.4-11.2)    | -1.0      | 0.751                |
| NKT-LIKE                                                                  | 58<br>(31-85)        | 77<br>(-44-199)      | 53<br>(28-79)        | 24        | 0.827                |
| NKT-LIKE cells<br>(% of Lymphocytes)                                      | 2.7<br>(1.8-3.6)     | 2.6<br>(0.4-4.7)     | 2.7<br>(1.6-3.8)     | -0.2      | 0.865                |
| Lineage negative (Lin-)                                                   | 173<br>(134-211)     | 176<br>(63-288)      | 172<br>(128-215)     | 4         | 0.935                |
| Lin- cells<br>(% of lymphocytes)                                          | 9.4<br>(7.3-11.5)    | 9.8<br>(4.2-15.3)    | 9.3<br>(6.9-11.7)    | 0.4       | 0.715                |

| <b>B CELLS IMMUNOPHENOTYPE (% OF TOTAL B CELLS)</b>                                          |             |              |              |       |        |
|----------------------------------------------------------------------------------------------|-------------|--------------|--------------|-------|--------|
| Naïve                                                                                        | 54.4        | 61.3         | 53.1         | -8.2  | 0.5540 |
| IgM <sup>+</sup> IgD <sup>++</sup> CD38 <sup>+</sup> CD27 <sup>-</sup> CD21 <sup>+</sup>     | (46.3-62.6) | (46.2-66.3)  | (43.6-62.7)  |       |        |
| CD21 <sup>low</sup>                                                                          | 9.4         | 11.2         | 8.9          | -2.3  | 0.9133 |
| IgM <sup>+</sup> IgD <sup>+</sup> CD38 <sup>low</sup> CD27 <sup>-</sup> CD21 <sup>low</sup>  | (5.3-13.5)  | (-6.2-28.6)  | (4.8-13.1)   |       |        |
| Class-switched memory                                                                        | 4.1         | 1.5          | 4.7          | 3.2   | 0.5995 |
| IgM <sup>-</sup> IgD <sup>-</sup> CD38 <sup>+</sup> CD27 <sup>+</sup> CD21 <sup>+</sup>      | (1.6-6.6)   | (0.2-2.8)    | (1.7-7.8)    |       |        |
| Non-switched memory                                                                          | 8.3         | 3.3          | 9.5          | 6.2   | 0.5168 |
| IgM <sup>++</sup> IgD <sup>+</sup> CD38 <sup>+</sup> CD27 <sup>+</sup> CD21 <sup>+</sup>     | (4.1-12.5)  | (1.3-5.3)    | (9.3-14.6)   |       |        |
| Transitional                                                                                 | 7.6         | 6.2          | 7.9          | 1.7   | 0.1459 |
| IgM <sup>++</sup> IgD <sup>++</sup> CD38 <sup>++</sup> CD27 <sup>-</sup> CD21 <sup>+</sup>   | (3.2-12.0)  | (4.0-8.4)    | (2.3-13.5)   |       |        |
| Plasmablasts                                                                                 | 0.37        | 0.87         | 0.25         | -0.63 | 0.0627 |
| IgM <sup>-/+</sup> IgD <sup>-</sup> CD38 <sup>+++</sup> CD27 <sup>++</sup> CD21 <sup>+</sup> | (0.05-0.69) | (-0.61-2.35) | (-0.03-0.52) |       |        |
| <b>T CELLS IMMUNOPHENOTYPE</b>                                                               |             |              |              |       |        |
| αβ T cells                                                                                   | 1409        | 1631         | 1356         | 275   | 0.751  |
|                                                                                              | (1145-1673) | (480-2782)   | (1101-1611)  |       |        |
| αβ T cells                                                                                   | 97.4        | 97.8         | 97.4         | 0.5   | 0.339  |
| (% of T cells)                                                                               | (96.8-98.1) | (95.9-99.7)  | (96.7-98.1)  |       |        |
| γδ T cells                                                                                   | 37.1        | 31.8         | 38.4         | -6.5  | 0.715  |
|                                                                                              | (24.8-49.4) | (2.6-61.1)   | (23.9-52.9)  |       |        |
| γδ T cells                                                                                   | 2.6         | 2.2          | 2.6          | -0.4  | 0.364  |
| (% of T cells)                                                                               | (1.9-3.2)   | (0.3-4.1)    | (1.9-3.3)    |       |        |
| αβ CD4 <sup>+</sup> T                                                                        | 805         | 743          | 819          | -76   | 0.608  |
|                                                                                              | (667-942)   | (323-1164)   | (664-975)    |       |        |
| αβ CD4 <sup>+</sup> T                                                                        | 58.7        | 49.4         | 61.1         | -11.7 | 0.067  |
| (% of αβ T cells)                                                                            | (54.4-63.2) | (33.0-65.8)  | (56.8-65.3)  |       |        |
| αβ CD8 <sup>+</sup> T                                                                        | 528         | 781          | 467          | 314   | 0.247  |
|                                                                                              | (384-672)   | (66-1497)    | (353-582)    |       |        |
| αβ CD8 <sup>+</sup> T                                                                        | 35.7        | 43.9         | 33.7         | 10.3  | 0.053  |
| (% of αβ T cells)                                                                            | (31.6-39.7) | (29.6-58.3)  | (29.8-37.6)  |       |        |
| αβ DN T cells                                                                                | 68.0        | 89.0         | 62.9         | 26    | 0.268  |
|                                                                                              | (48.5-87.4) | (33.6-144.5) | (41.1-84.7)  |       |        |
| αβ DN T cells                                                                                | 5.0         | 6.1          | 4.8          | 1.3   | 0.364  |
| (% of αβ T cells)                                                                            | (3.9-6.1)   | (2.3-9.8)    | (3.6-5.9)    |       |        |
| αβ CD4 <sup>+</sup> CD8 <sup>+</sup> T                                                       | 8.5         | 17.0         | 6.4          | 10.6  | 0.903  |
|                                                                                              | (2.6-14.3)  | (-17.3-51.3) | (2.9-10.0)   |       |        |
| αβ CD4 <sup>+</sup> CD8 <sup>+</sup> T                                                       | 0.52        | 0.62         | 0.50         | 0.12  | 0.679  |
| (% of αβ T cells)                                                                            | (0.24-0.80) | (-0.22-1.47) | (0.18-0.81)  |       |        |
| αβ CD4 <sup>+</sup> DR <sup>+</sup> T                                                        | 36.1        | 32.8         | 36.9         | -4.1  | 0.865  |
|                                                                                              | (27.6-44.5) | (11.4-54.1)  | (27.0-46.8)  |       |        |
| αβ CD4 <sup>+</sup> DR <sup>+</sup> T                                                        | 5.1         | 5.3          | 5.0          | 0.3   | 0.751  |
| (% of CD4 αβ T cells)                                                                        | (3.9-6.2)   | (2.0-8.6)    | (3.7-6.3)    |       |        |
| αβ CD4 <sup>+</sup> CD69 <sup>+</sup> T                                                      | 11.6        | 10.4         | 11.9         | -1.6  | 0.942  |
|                                                                                              | (8.2-15.1)  | (2.2-18.6)   | (7.9-16.0)   |       |        |
| αβ CD4 <sup>+</sup> CD69 <sup>+</sup> T                                                      | 1.6         | 1.7          | 1.5          | 0.1   | 0.478  |
| (% of CD4 αβ T cells)                                                                        | (1.0-2.1)   | (0.5-2.8)    | (0.9-2.2)    |       |        |
| αβ CD4 <sup>+</sup> DR <sup>+</sup> CD69 <sup>+</sup> T                                      | 1.1         | 1.5          | 1.0          | 0.5   | 0.827  |
|                                                                                              | (0.6-1.6)   | (-0.8-3.8)   | (0.5-1.4)    |       |        |
| αβ CD4 <sup>+</sup> DR <sup>+</sup> CD69 <sup>+</sup> T                                      | 0.2         | 0.2          | 0.1          | 0.1   | 0.339  |
| % of CD4 αβ T cells                                                                          | (0.1-0.2)   | (0.1-0.5)    | (0.07-0.2)   |       |        |
| αβ CD4 <sup>+</sup> DR <sup>+</sup> CD38 <sup>+</sup> T                                      | 13.8        | 16.7         | 13.1         | 3.6   | 0.510  |
|                                                                                              | (8.9-18.8)  | (-0.4-33.8)  | (7.7-18.5)   |       |        |
| αβ CD4 <sup>+</sup> DR <sup>+</sup> CD38 <sup>+</sup> T                                      | 2.1         | 2.8          | 1.9          | 0.9   | 0.643  |
| (% of CD4 αβ T cells)                                                                        | (1.4-2.8)   | (0.2-5.4)    | (1.1-2.6)    |       |        |
| αβ CD4 <sup>+</sup> CD38 <sup>+</sup> CD69 <sup>+</sup> T                                    | 4.6         | 5.7          | 4.4          | 1.4   | 0.364  |
|                                                                                              | (3.0-6.3)   | (0.2-11.2)   | (2.6-6.1)    |       |        |
| αβ CD4 <sup>+</sup> CD38 <sup>+</sup> CD69 <sup>+</sup> T                                    | 0.6         | 0.8          | 0.6          | 0.2   | 0.247  |
| (% of CD4 αβ T cells)                                                                        | (0.4-0.8)   | (0.3-1.3)    | (0.4-0.7)    |       |        |
| αβ CD8 <sup>+</sup> DR <sup>+</sup> T                                                        | 32.2        | 39.9         | 30.3         | 9.5   | 0.105  |
|                                                                                              | (22.1-42.3) | (21.5-58.3)  | (18.2-42.5)  |       |        |
| αβ CD8 <sup>+</sup> DR <sup>+</sup> T                                                        | 6.9         | 7.6          | 6.7          | 0.9   | 0.510  |
| (% of CD8 αβ T cells)                                                                        | (5.3-8.4)   | (3.5-11.8)   | (4.9-8.5)    |       |        |
| αβ CD8 <sup>+</sup> CD69 <sup>+</sup> T                                                      | 22.1        | 26.1         | 21.2         | 4.9   | 0.247  |
|                                                                                              | (6.7-37.6)  | (-3.2-55.4)  | (2.5-39.9)   |       |        |
| αβ CD8 <sup>+</sup> CD69 <sup>+</sup> T                                                      | 4.3         | 3.2          | 4.5          | -1.3  | 0.227  |
| (% of CD8 αβ T cells)                                                                        | (1.3-7.3)   | (2.3-4.2)    | (0.8-8.3)    |       |        |
| αβ CD8 <sup>+</sup> DR <sup>+</sup> CD69 <sup>+</sup> T                                      | 1.6         | 2.4          | 1.4          | 0.9   | 0.208  |

|                                            |                    |                    |                    |     |       |
|--------------------------------------------|--------------------|--------------------|--------------------|-----|-------|
|                                            | (1.1-2.1)          | (0.2-4.6)          | (0.9-1.9)          |     |       |
| αβ CD8+DR+CD69+ T<br>(% of CD8 αβ T cells) | 0.4<br>(0.3-0.5)   | 0.5<br>(0.1-1.0)   | 0.3<br>(0.2-0.4)   | 0.2 | 0.391 |
| αβ CD8+DR+CD38+ T                          | 13.5<br>(8.2-18.8) | 19.2<br>(3.7-34.6) | 12.1<br>(6.2-18.1) | 7.0 | 0.130 |
| αβ CD8+DR+CD38+ T<br>(% of CD8 αβ T cells) | 2.7<br>(1.9-3.4)   | 3.2<br>(0.8-5.5)   | 2.5<br>(1.7-3.3)   | 0.6 | 0.478 |
| αβ CD8+CD38+CD69+ T                        | 3.8<br>(1.5-6.1)   | 9.0<br>(-3.6-21.5) | 2.6<br>(1.3-3.9)   | 6.4 | 0.105 |
| αβ CD8+CD38+CD69+<br>(% of CD8 αβ T cells) | 0.7<br>(0.4-0.9)   | 0.9<br>(0.4-1.4)   | 0.6<br>(0.3-0.9)   | 0.3 | 0.095 |

---

**NK IMMUNOPHENOTYPE (% OF TOTAL NK CELLS)**

|                             |                        |                    |                     |      |       |
|-----------------------------|------------------------|--------------------|---------------------|------|-------|
| NK CD56 <sup>dim</sup>      | 157.3<br>(108.4-206.2) | 117<br>(28-206)    | 167<br>(108-226)    | -50  | 0.715 |
| NK CD56 <sup>dim</sup> %    | 90.6<br>(86.4-94.8)    | 83.7<br>(57-111)   | 92.2<br>(91-94)     | -8.5 | 0.751 |
| NK CD56 <sup>bright</sup>   | 10.3<br>(7.8-12.8)     | 7.2<br>(4.2-10.2)  | 11.0<br>(8.0-14.1)  | -3.8 | 0.391 |
| NK CD56 <sup>bright</sup> % | 7.31<br>(6.11-8.51)    | 5.6<br>(3.7-7.5)   | 7.7<br>(6.3-9.1)    | -2.2 | 0.208 |
| NK DR+                      | 16.7<br>(11.8-21.5)    | 10.4<br>(3.8-16.9) | 18.2<br>(12.4-24.0) | -7.8 | 0.268 |
| NK DR+ %                    | 13.2<br>(8.8-17.6)     | 8.0<br>(3.6-12.4)  | 14.4<br>(9.1-19.8)  | -6.4 | 0.247 |
| NK CD69+                    | 9.5<br>(4.8-14.1)      | 5.4<br>(0.8-10.0)  | 10.4<br>(4.7-16.2)  | -5.0 | 0.608 |
| NK CD69+ %                  | 6.7<br>(3.4-10.0)      | 3.5<br>(1.0-6.0)   | 7.5<br>(3.5-11.5)   | -4.0 | 0.751 |
| NK DR+CD69+                 | 2.7<br>(-0.2-5.5)      | 1.0<br>(0.1-1.8)   | 3.1<br>(-0.5-6.6)   | -2.1 | 0.679 |
| NK DR+CD69+ %               | 2.8<br>(-0.3-5.8)      | 0.7<br>(0.01-1.4)  | 3.3<br>(-0.5-7.1)   | -2.6 | 0.478 |

---

**PUTATIVE LYMPHOID PRECURSORS**

|                                    |                      |                    |                    |       |       |
|------------------------------------|----------------------|--------------------|--------------------|-------|-------|
| PUTATIVE CD56-CD16+<br>PRECURSORS  | 11.3<br>(7.5-15.1)   | 5.7<br>(-1.6-13.0) | 12.7<br>(8.2-17.1) | -6.9  | 0.060 |
| PUTATIVE CD56-CD16+<br>PRECURSORS% | 3.45<br>(2.23-4.67)  | 2.9<br>(-2.2-8.1)  | 3.6<br>(2.4-4.8)   | -0.7  | 0.227 |
| LIN-DNAM <sup>bright</sup>         | 9.99<br>(6.56-13.41) | 4.4<br>(-0.13-9.0) | 11.3<br>(7.3-15.4) | -6.9  | 0.075 |
| LIN-DNAM <sup>bright</sup> %       | 3.06<br>(1.85-4.27)  | 1.6<br>(0.2-3.0)   | 3.3<br>(1.9b -4.8) | -1.79 | 0.291 |

---

Quantitative variables were expressed as means with a 95% confidence interval, while qualitative variables were represented as absolute frequencies with percentages relative to the total of the respective column. OR: odds ratio; MD: mean difference; P values were calculated by either unpaired two-tailed Student's t-test or Mann-Whitney u test according to variable distribution and sample size. DN: double negative; Univar.: univariate analysis.

---

**Table S4. Comparison between CVID patients with active CMV/EBV replication vs non-replicating**

|                                                                           | Total<br>(31)        | CMV/EBV<br>(8)       | No-CMV/EBV<br>(23)   | OR/<br>MD | P value<br>(univ.) |
|---------------------------------------------------------------------------|----------------------|----------------------|----------------------|-----------|--------------------|
| <b>SAMPLE DEMOGRAPHICS</b>                                                |                      |                      |                      |           |                    |
| Male                                                                      | 14(45%)              | 3(38%)               | 11(48%)              | 0.6545    | 0.6980             |
| Female                                                                    | 17(55%)              | 5(63%)               | 12(52%)              | 1.528     | 0.6980             |
| Age                                                                       | 50.4<br>(44.1-56.7)  | 52.4<br>(38.4-66.3)  | 49.7<br>(842.1-57.3) | 2.64      | 0.7142             |
| <b>CLINICAL VARIABLES</b>                                                 |                      |                      |                      |           |                    |
| Age at diagnosis                                                          | 39.0<br>(32.3-45.8)  | 40.0<br>(25.1-54.9)  | 38.7<br>(30.5-46.9)  | 1.304     | 0.7820             |
| Disease duration                                                          | 13.7<br>(8.8-18.5)   | 13.6<br>(6.1-21.2)   | 13.7<br>(7.4-19.9)   | -0.03     | 0.5265             |
| Ig replacement therapy (IGRT)                                             | 26(84%)              | 7(88%)               | 19(83%)              | 1.474     | >0.9999            |
| IGRT duration                                                             | 8.1<br>(4.8-11.4)    | 9.6<br>(2.2-17.0)    | 7.6<br>(3.6-11.5)    | 2.02      | 0.5205             |
| Infections                                                                | 29(94%)              | 8(100%)              | 21(91%)              | Infinity  | >0.9999            |
| Autoimmunity                                                              | 19(61%)              | 5(63%)               | 14(61%)              | 1.071     | >0.9999            |
| Splenomegaly                                                              | 12(39%)              | 6(75%)               | 6(26%)               | 8.500     | <b>0.0316</b>      |
| Granulomatosis                                                            | 6(19%)               | 2(25%)               | 4(17%)               | 1.583     | 0.6344             |
| Malignancies                                                              | 6(19%)               | 2(25%)               | 4(17%)               | 1.583     | 0.6344             |
| Lymphadenomegaly                                                          | 12(39%)              | 5(63%)               | 7(30%)               | 3.810     | 0.2055             |
| Lung involvement                                                          | 13(42%)              | 5(63%)               | 8(35%)               | 3.125     | 0.2285             |
| Atopy                                                                     | 10(32%)              | 0(0%)                | 10(43%)              | 0         | <b>0.0317</b>      |
| <b>IMMUNOGLOBULINS</b>                                                    |                      |                      |                      |           |                    |
| IgG (onset) (g/L)                                                         | 3.1<br>(2.3-4.0)     | 3.1<br>(1.1-5.0)     | 3.2<br>(2.2-4.2)     | -0.10     | 0.9205             |
| IgA (g/L)                                                                 | 0.48<br>(-0.02-0.18) | 0.26<br>(-0.01-0.53) | 0.56<br>(-0.12-1.24) | -0.30     | >0.9999            |
| IgM (g/L)                                                                 | 0.38<br>(0.18-0.59)  | 0.28<br>(-0.05-0.60) | 0.42<br>(0.15-0.69)  | -0.14     | 0.5420             |
| IgE (kU/L)                                                                | 10.1<br>(2.7-17.5)   | 6.5<br>(-5.57-18.62) | 11.6<br>(1.8-21.5)   | -5.1      | 0.3650             |
| <b>GENERAL IMMUNOPHENOTYPE (ABSOLUTE COUNT: CELLS/ <math>\mu</math>L)</b> |                      |                      |                      |           |                    |
| Lymphocytes                                                               | 2118<br>(1698-2538)  | 2075<br>(963-3187)   | 2133<br>(1654-2612)  | -59       | 0.520              |
| Lymphocytes<br>(% of WBC)                                                 | 35.3<br>(31.2-39.5)  | 36.5<br>(26.3-48.8)  | 35.0<br>(30.5-39.5)  | 1.5       | 0.642              |
| Monocytes                                                                 | 369<br>(306-432)     | 368<br>(194-542)     | 370<br>(300-440)     | -2        | 0.981              |
| Monocytes<br>(% of WBC)                                                   | 6.3<br>(5.3-7.2)     | 6.1<br>(5.2-7.1)     | 6.3<br>(5.0-7.7)     | -0.3      | 0.674              |
| T cells                                                                   | 1446<br>(1177-1716)  | 1533<br>(727-2338)   | 1417<br>(1130-1703)  | 116       | 1.000              |
| T Lymphocytes<br>(% of Lymphocytes)                                       | 69.3<br>(65.4-73.2)  | 74.2<br>(68.3-80.0)  | 67.6<br>(62.7-72.5)  | 6.6       | 0.132              |
| B cells                                                                   | 266<br>(155-378)     | 209<br>(-17-435)     | 277<br>(143-410)     | -68       | 0.464              |
| B Lymphocytes %                                                           | 10.9<br>(7.9-13.8)   | 8.3<br>(4.2-12.5)    | 11.7<br>(8.0-15.6)   | -3.4      | 0.464              |
| NK cells                                                                  | 172<br>(121-222)     | 124<br>(54-194)      | 188<br>(123-253)     | -64       | 0.520              |
| NK cells<br>(% of Lymphocytes)                                            | 8.6<br>(6.5-10.7)    | 7.0<br>(3.1-10.9)    | 9.2<br>(6.6-11.7)    | -2.1      | 0.411              |
| NKT-LIKE                                                                  | 58<br>(31-85)        | 72<br>(-13-156)      | 53<br>(26-80)        | 19        | 0.808              |
| NKT-LIKE cells<br>(% of Lymphocytes)                                      | 2.7<br>(1.8-3.6)     | 2.7<br>(1.0-4.4)     | 2.7<br>(1.5-3.9)     | 0.02      | 0.740              |
| Lineage negative (Lin-)                                                   | 173<br>(134-211)     | 169<br>(83-256)      | 174<br>(128-220)     | -4        | 0.842              |
| Lin- cells<br>(% of lymphocytes)                                          | 9.4<br>(7.3-11.5)    | 9.6<br>(5.5-13.8)    | 9.3<br>(6.8-11.9)    | 0.3       | 0.707              |
| <b>B CELLS IMMUNOPHENOTYPE (% OF TOTAL B CELLS)</b>                       |                      |                      |                      |           |                    |

|                                                                                              |             |              |              |      |        |
|----------------------------------------------------------------------------------------------|-------------|--------------|--------------|------|--------|
| Naïve                                                                                        | 54.4        | 60.7         | 52.5         | 8.2  | 0.5234 |
| IgM <sup>+</sup> IgD <sup>++</sup> CD38 <sup>+</sup> CD27 <sup>-</sup> CD21 <sup>+</sup>     | (46.3-62.6) | (48.3-73.0)  | (42.1-62.8)  |      |        |
| CD21 <sup>low</sup>                                                                          | 9.4         | 11.1         | 8.8          | 2.3  | 0.5569 |
| IgM <sup>+</sup> IgD <sup>+</sup> CD38 <sup>low</sup> CD27 <sup>-</sup> CD21 <sup>low</sup>  | (5.3-13.5)  | (-0.6-22.9)  | (4.3-13.3)   |      |        |
| Class-switched memory                                                                        | 4.1         | 2.0          | 4.9          | -2.9 | 0.9735 |
| IgM <sup>-</sup> IgD <sup>-</sup> CD38 <sup>+</sup> CD27 <sup>+</sup> CD21 <sup>+</sup>      | (1.6-6.6)   | (0.6-3.3)    | (1.6-8.2)    |      |        |
| Non-switched memory                                                                          | 8.3         | 3.2          | 10.0         | -6.8 | 0.4433 |
| IgM <sup>++</sup> IgD <sup>+</sup> CD38 <sup>+</sup> CD27 <sup>+</sup> CD21 <sup>+</sup>     | (4.1-12.5)  | (1.6-4.8)    | (4.5-15.6)   |      |        |
| Transitional                                                                                 | 7.6         | 7.4          | 7.7          | -0.3 | 0.0845 |
| IgM <sup>++</sup> IgD <sup>++</sup> CD38 <sup>++</sup> CD27 <sup>-</sup> CD21 <sup>+</sup>   | (3.2-12.0)  | (3.1-11.7)   | (1.6-13.7)   |      |        |
| Plasmablasts                                                                                 | 0.37        | 0.66         | 0.26         | 0.40 | 0.1648 |
| IgM <sup>-/+</sup> IgD <sup>-</sup> CD38 <sup>+++</sup> CD27 <sup>++</sup> CD21 <sup>+</sup> | (0.05-0.69) | (-0.38-1.71) | (-0.04-0.57) |      |        |

### T CELLS IMMUNOPHENOTYPE

|                                                           |             |              |             |       |       |
|-----------------------------------------------------------|-------------|--------------|-------------|-------|-------|
| αβ T cells                                                | 1409        | 1503         | 1376        | 128   | 1.000 |
|                                                           | (1145-1673) | (701-2307)   | (1100-1653) |       |       |
| αβ T cells                                                | 97.4        | 98.0         | 97.3        | 0.7   | 0.172 |
| (% of T cells)                                            | (96.8-98.1) | (96.6-99.3)  | (96.5-98.0) |       |       |
| γδ T cells                                                | 37.1        | 28.7         | 40.1        | -11   | 0.492 |
|                                                           | (24.8-49.4) | (7.9-49.5)   | (24.4-55.7) |       |       |
| γδ T cells                                                | 2.6         | 2.0          | 2.7         | -0.7  | 0.172 |
| (% of T cells)                                            | (1.9-3.2)   | (0.7-3.4)    | (2.0-3.5)   |       |       |
| αβ CD4 <sup>+</sup> T                                     | 805         | 738          | 828         | -90   | 0.566 |
|                                                           | (667-942)   | (448-1027)   | (659-997)   |       |       |
| αβ CD4 <sup>+</sup> T                                     | 58.7        | 53.0         | 60.8        | -7.8  | 0.219 |
| (% of αβ T cells)                                         | (54.4-63.2) | (40.5-65.4)  | (56.2-65.4) |       |       |
| αβ CD8 <sup>+</sup> T                                     | 528         | 679          | 476         | 203   | 0.437 |
|                                                           | (384-672)   | (172-1186)   | (352-600)   |       |       |
| αβ CD8 <sup>+</sup> T                                     | 35.7        | 41.3         | 33.7        | 7.7   | 0.121 |
| (% of αβ T cells)                                         | (31.6-39.7) | (30.8-51.9)  | (29.4-38.0) |       |       |
| αβ DN T cells                                             | 68.0        | 73.3         | 66.1        | 7.2   | 0.947 |
|                                                           | (48.5-87.4) | (28.7-117.9) | (42.8-89.4) |       |       |
| αβ DN T cells                                             | 5.0         | 5.1          | 5.0         | 0.1   | 0.877 |
| (% of αβ T cells)                                         | (3.9-6.1)   | (2.2-8.0)    | (3.8-6.2)   |       |       |
| αβ CD4 <sup>+</sup> CD8 <sup>+</sup> T                    | 8.5         | 13.9         | 6.6         | 7.3   | 1.000 |
|                                                           | (2.6-14.3)  | (-9.8-37.5)  | (2.8-10.5)  |       |       |
| αβ CD4 <sup>+</sup> CD8 <sup>+</sup> T                    | 0.52        | 0.56         | 0.51        | 0.05  | 0.611 |
| (% of αβ T cells)                                         | (0.24-0.80) | (-0.02-1.15) | (0.16-0.86) |       |       |
| αβ CD4 <sup>+</sup> DR <sup>+</sup> T                     | 36.1        | 33.8         | 36.9        | -3.1  | 0.912 |
|                                                           | (27.6-44.5) | (17.0-50.6)  | (26.3-47.4) |       |       |
| αβ CD4 <sup>+</sup> DR <sup>+</sup> T                     | 5.1         | 5.4          | 5.0         | 0.5   | 0.740 |
| (% of CD4 αβ T cells)                                     | (3.9-6.2)   | (2.6-8.2)    | (3.6-6.3)   |       |       |
| αβ CD4 <sup>+</sup> CD69 <sup>+</sup> T                   | 11.6        | 9.6          | 12.3        | -2.7  | 0.707 |
|                                                           | (8.2-15.1)  | (3.9-15.3)   | (7.9-16.8)  |       |       |
| αβ CD4 <sup>+</sup> CD69 <sup>+</sup> T                   | 1.6         | 1.5          | 1.6         | -0.1  | 0.707 |
| (% of CD4 αβ T cells)                                     | (1.0-2.1)   | (0.7-2.3)    | (0.9-2.3)   |       |       |
| αβ CD4 <sup>+</sup> DR <sup>+</sup> CD69 <sup>+</sup> T   | 1.1         | 1.3          | 1.0         | 0.3   | 0.912 |
|                                                           | (0.6-1.6)   | (-0.3-2.8)   | (0.5-1.5)   |       |       |
| αβ CD4 <sup>+</sup> DR <sup>+</sup> CD69 <sup>+</sup> T   | 0.2         | 0.20         | 0.14        | 0.06  | 0.437 |
| % of CD4 αβ T cells                                       | (0.1-0.2)   | (-0.01-0.41) | (0.06-0.21) |       |       |
| αβ CD4 <sup>+</sup> DR <sup>+</sup> CD38 <sup>+</sup> T   | 13.8        | 19.1         | 12.0        | 7.2   | 0.121 |
|                                                           | (8.9-18.8)  | (6.6-31.7)   | (6.4-17.5)  |       |       |
| αβ CD4 <sup>+</sup> DR <sup>+</sup> CD38 <sup>+</sup> T   | 2.1         | 3.09         | 1.69        | 1.40  | 0.187 |
| (% of CD4 αβ T cells)                                     | (1.4-2.8)   | (1.13-5.05)  | (0.98-2.39) |       |       |
| αβ CD4 <sup>+</sup> CD38 <sup>+</sup> CD69 <sup>+</sup> T | 4.6         | 5.3          | 4.4         | 0.9   | 0.386 |
|                                                           | (3.0-6.3)   | (1.4-9.2)    | (2.4-6.3)   |       |       |
| αβ CD4 <sup>+</sup> CD38 <sup>+</sup> CD69 <sup>+</sup> T | 0.6         | 0.73         | 0.57        | 0.16  | 0.339 |
| (% of CD4 αβ T cells)                                     | (0.4-0.8)   | (0.35-1.10)  | (0.37-0.76) |       |       |
| αβ CD8 <sup>+</sup> DR <sup>+</sup> T                     | 32.2        | 37.9         | 30.2        | 7.7   | 0.145 |
|                                                           | (22.1-42.3) | (22.1-53.7)  | (17.2-43.2) |       |       |
| αβ CD8 <sup>+</sup> DR <sup>+</sup> T                     | 6.9         | 7.94         | 6.50        | 1.44  | 0.386 |
| (% of CD8 αβ T cells)                                     | (5.3-8.4)   | (4.01-1.87)  | (4.72-8.29) |       |       |
| αβ CD8 <sup>+</sup> CD69 <sup>+</sup> T                   | 22.1        | 22.7         | 21.9        | 0.8   | 0.295 |
|                                                           | (6.7-37.6)  | (2.3-43.2)   | (1.5-42.3)  |       |       |
| αβ CD8 <sup>+</sup> CD69 <sup>+</sup> T                   | 4.3         | 3.28         | 4.63        | -1.35 | 0.091 |
| (% of CD8 αβ T cells)                                     | (1.3-7.3)   | (2.65-3.90)  | (0.52-8.74) |       |       |
| αβ CD8 <sup>+</sup> DR <sup>+</sup> CD69 <sup>+</sup> T   | 1.6         | 2.2          | 1.4         | 0.8   | 0.187 |
|                                                           | (1.1-2.1)   | (0.6-3.7)    | (0.9-2.0)   |       |       |

|                                            |                    |                     |                     |      |       |
|--------------------------------------------|--------------------|---------------------|---------------------|------|-------|
| αβ CD8+DR+CD69+ T<br>(% of CD8 αβ T cells) | 0.4<br>(0.3-0.5)   | 0.49<br>(0.17-0.80) | 0.32<br>(0.21-0.43) | 0.16 | 0.275 |
| αβ CD8+DR+CD38+ T                          | 13.5<br>(8.2-18.8) | 18.3<br>(6.7-29.9)  | 11.9<br>(5.5-18.2)  | 6.4  | 0.082 |
| αβ CD8+DR+CD38+ T<br>(% of CD8 αβ T cells) | 2.7<br>(1.9-3.4)   | 3.46<br>(1.28-5.63) | 2.38<br>(1.64-3.11) | 1.08 | 0.295 |
| αβ CD8+CD38+CD69+ T                        | 3.8<br>(1.5-6.1)   | 7.1<br>(-1.8-16.1)  | 2.6<br>(1.2-4.1)    | 4.5  | 0.158 |
| αβ CD8+CD38+CD69+<br>(% of CD8 αβ T cells) | 0.7<br>(0.4-0.9)   | 0.77<br>(0.38-1.16) | 0.62<br>(0.31-0.93) | 0.15 | 0.121 |

---

#### NK IMMUNOPHENOTYPE (% OF TOTAL NK CELLS)

|                             |                        |                       |                        |       |       |
|-----------------------------|------------------------|-----------------------|------------------------|-------|-------|
| NK CD56 <sup>dim</sup>      | 157.3<br>(108.4-206.2) | 102.0<br>(36.4-167.6) | 176.6<br>(114.3-238.9) | -74.6 | 0.317 |
| NK CD56 <sup>dim</sup> %    | 90.6<br>(86.4-94.8)    | 85.8<br>(67.4-104.2)  | 92.2<br>(90.7-93.7)    | -6.4  | 0.877 |
| NK CD56 <sup>bright</sup>   | 10.3<br>(7.8-12.8)     | 6.5<br>(4.1-8.8)      | 11.6<br>(8.4-14.8)     | -5.2  | 0.082 |
| NK CD56 <sup>bright</sup> % | 7.31<br>(6.11-8.51)    | 6.2<br>(4.4-7.9)      | 7.7<br>(6.2-9.2)       | -1.6  | 0.362 |
| NK DR+                      | 16.7<br>(11.8-21.5)    | 9.4<br>(4.7-14.2)     | 19.2<br>(13.0-25.4)    | -9.8  | 0.074 |
| NK DR+ %                    | 13.2<br>(8.8-17.6)     | 9.0<br>(5.5-12.4)     | 14.7<br>(8.8-20.5)     | -5.7  | 0.492 |
| NK CD69+                    | 9.5<br>(4.8-14.1)      | 4.8<br>(1.5-8.0)      | 11.1<br>(4.9-17.3)     | -6.4  | 0.464 |
| NK CD69+ %                  | 6.7<br>(3.4-10.0)      | 4.2<br>(1.7-6.7)      | 7.6<br>(3.2-12.0)      | -3.4  | 0.947 |
| NK DR+CD69+                 | 2.7<br>(-0.2-5.5)      | 0.8<br>(0.1-1.4)      | 3.3<br>(-0.6-7.2)      | -2.5  | 0.674 |
| NK DR+CD69+ %               | 2.8<br>(-0.3-5.8)      | 0.6<br>(0.1-1.2)      | 3.5<br>(-0.6-7.7)      | -2.9  | 0.642 |

---

#### PUTATIVE LYMPHOID PRECURSORS

|                                    |                      |                      |                       |       |              |
|------------------------------------|----------------------|----------------------|-----------------------|-------|--------------|
| PUTATIVE CD56-CD16+<br>PRECURSORS  | 11.3<br>(7.5-15.1)   | 5.10<br>(0.07-10.12) | 13.47<br>(8.81-18.13) | -8.4  | <b>0.012</b> |
| PUTATIVE CD56-CD16+<br>PRECURSORS% | 3.45<br>(2.23-4.67)  | 2.65<br>(-0.89-6.19) | 3.73<br>(2.43-5.02)   | -1.07 | 0.145        |
| LIN-DNAM <sup>bright</sup>         | 9.99<br>(6.56-13.41) | 3.90<br>(0.72-7.07)  | 12.10<br>(7.86-16.34) | -8.2  | <b>0.034</b> |
| LIN-DNAM <sup>bright</sup> %       | 3.06<br>(1.85-4.27)  | 1.51<br>(0.53-2.50)  | 3.60<br>(2.02-5.17)   | -2.09 | 0.172        |

Quantitative variables were expressed as means with a 95% confidence interval, while qualitative variables were represented as absolute frequencies with percentages relative to the total of the respective column. P values were calculated by either unpaired two-tailed Student's t-test or Mann-Whitney u test according to variable distribution and sample size. OR: odds ratio; MD: mean difference; DN: double negative; Univ.: univariate analysis. [MAPO](#)

# Supplementary figure

Fig. S1

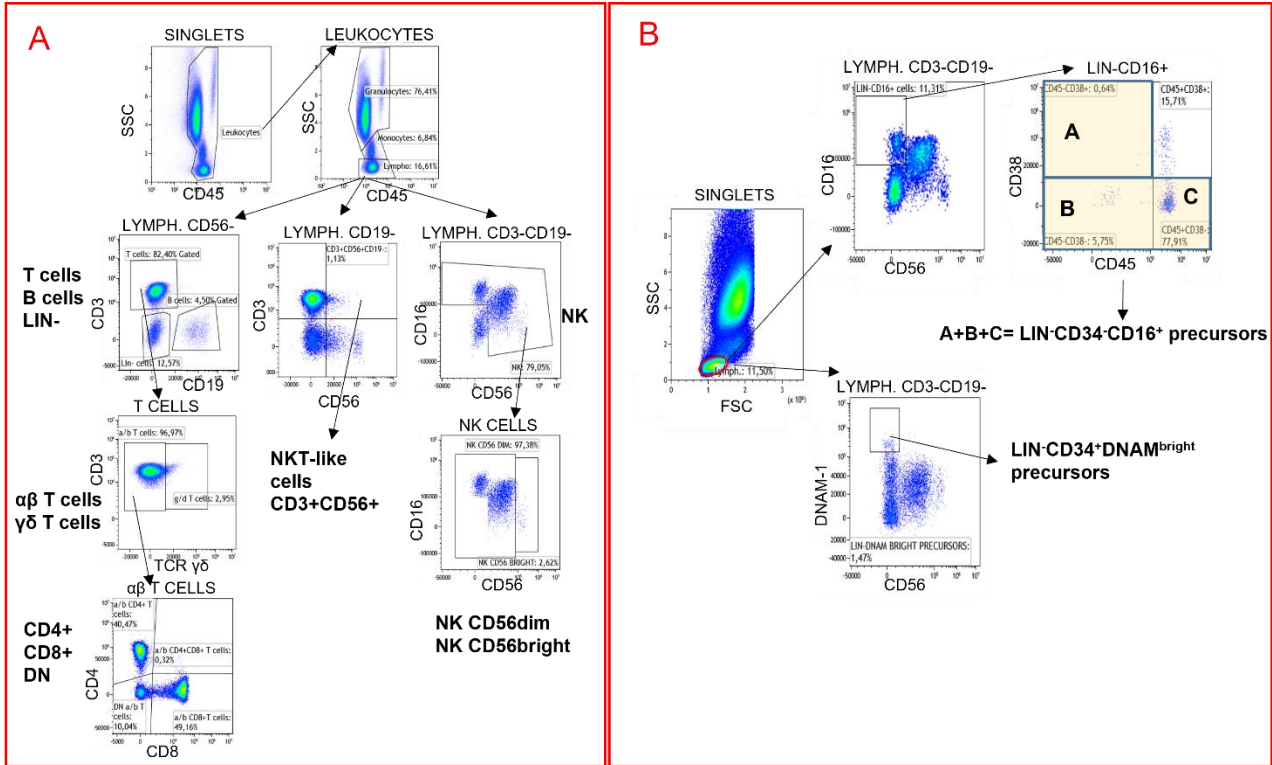

## Legend to supplementary figure

**Fig. S1: Gating strategy.** **A.** Leukocyte population gating strategy (CD45/SSc). **B.** Side Scatter/Forward Scatter gating strategy to identify inflammatory lymphoid precursors (LIN-CD34-CD16+, LIN-CD34+DNAMbright).  
Abbreviations: DN: double negative; FSC: forward scatter; LIN: lineage; Lymph.: lymphocytes; SSC: side scatter.
